# Supplementary material for: White and grey matter development in utero assessed using motion-corrected diffusion tensor imaging and its comparison to ex utero measures
Source: Springer Nature journal article supplement (doi:10.1007/s10334-019-00743-5), 2019-03-12

## Supplementary Material

**Figure A:** Bland Altman Plot: comparison of ADC values between fetal and neonatal DTI acquisition protocols

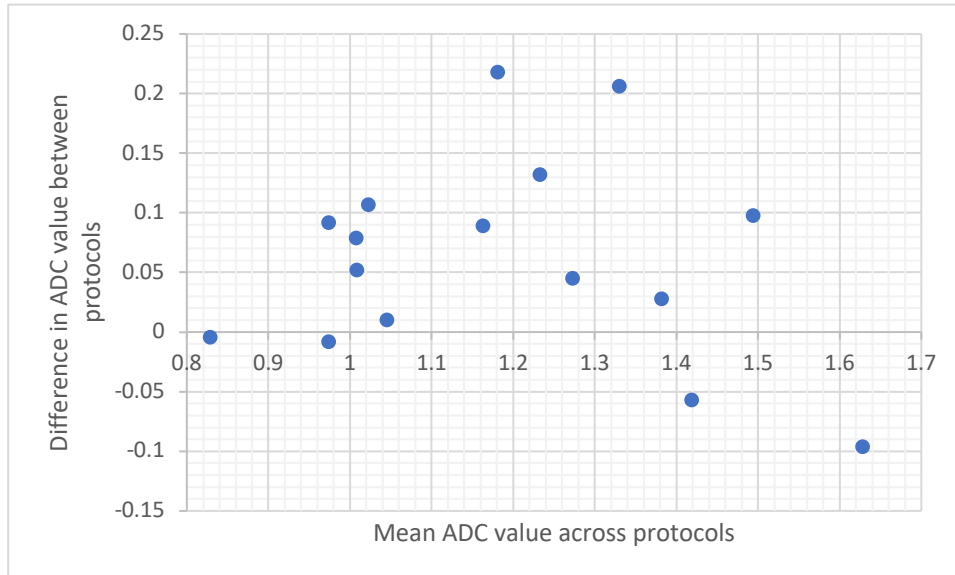

**Figure B:** Bland Altman Plot: comparison of FA values between fetal and neonatal DTI acquisition protocols

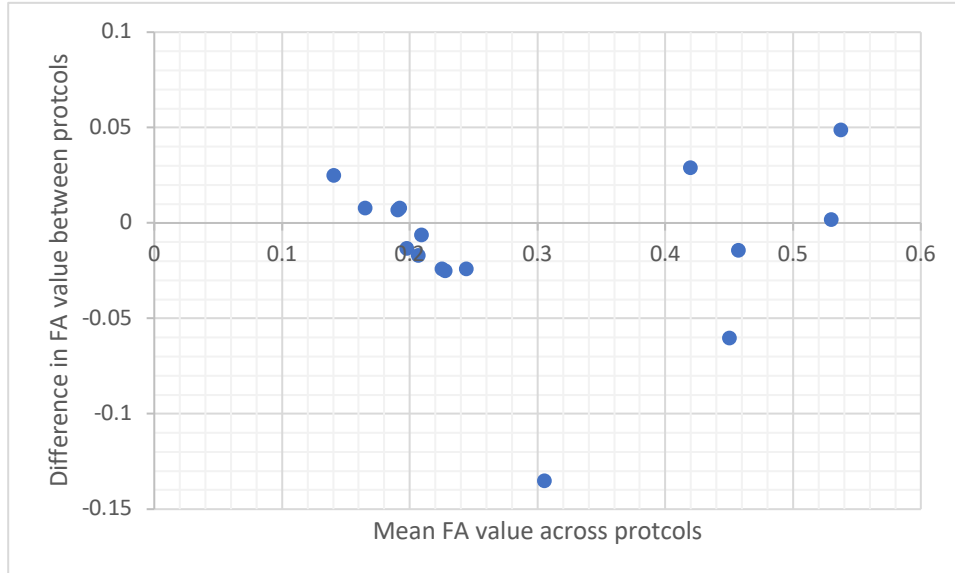

Supplement: MOESM1 [file 16539304]
